# Supplementary material
Source: Springer Nature journal article supplement (https://www.springermedizin.de/resource/supplementary/12885_2006_613_MOESM1_ESM.pdf/9469896)

Age-standardised breast cancer incidences

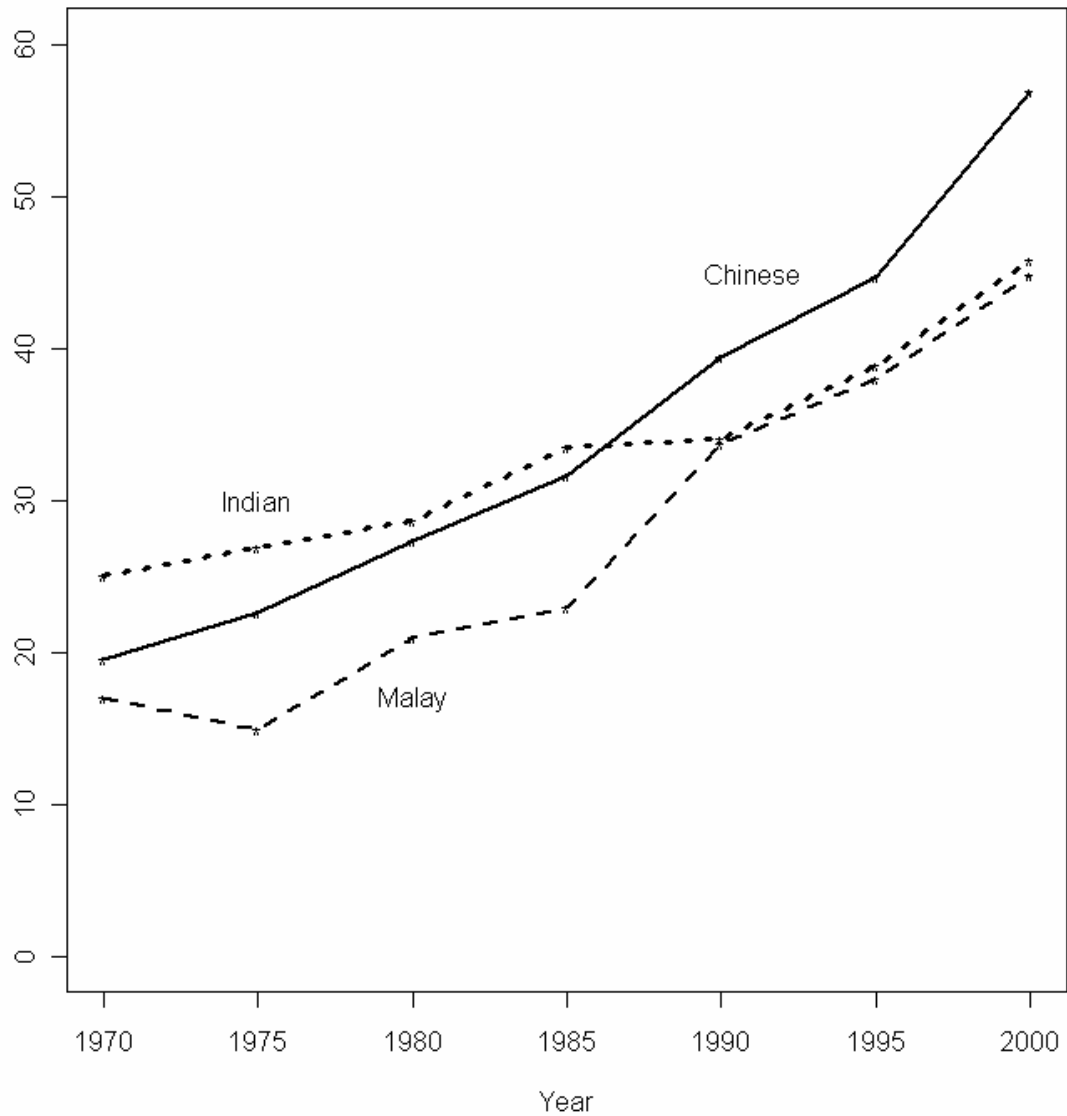

Supplement: MOESM1 [file 9469896]
